# Supplementary material for: New highly active chiral phosphapalladacycle catalysts. First isolation and characterization of a Pd(iv) intermediate
Source: Royal Society of Chemistry journal article supplement (doi:10.1039/b005521m), 2000-01-01
Supplement: b005521m.doc [file b005521m.doc]

**
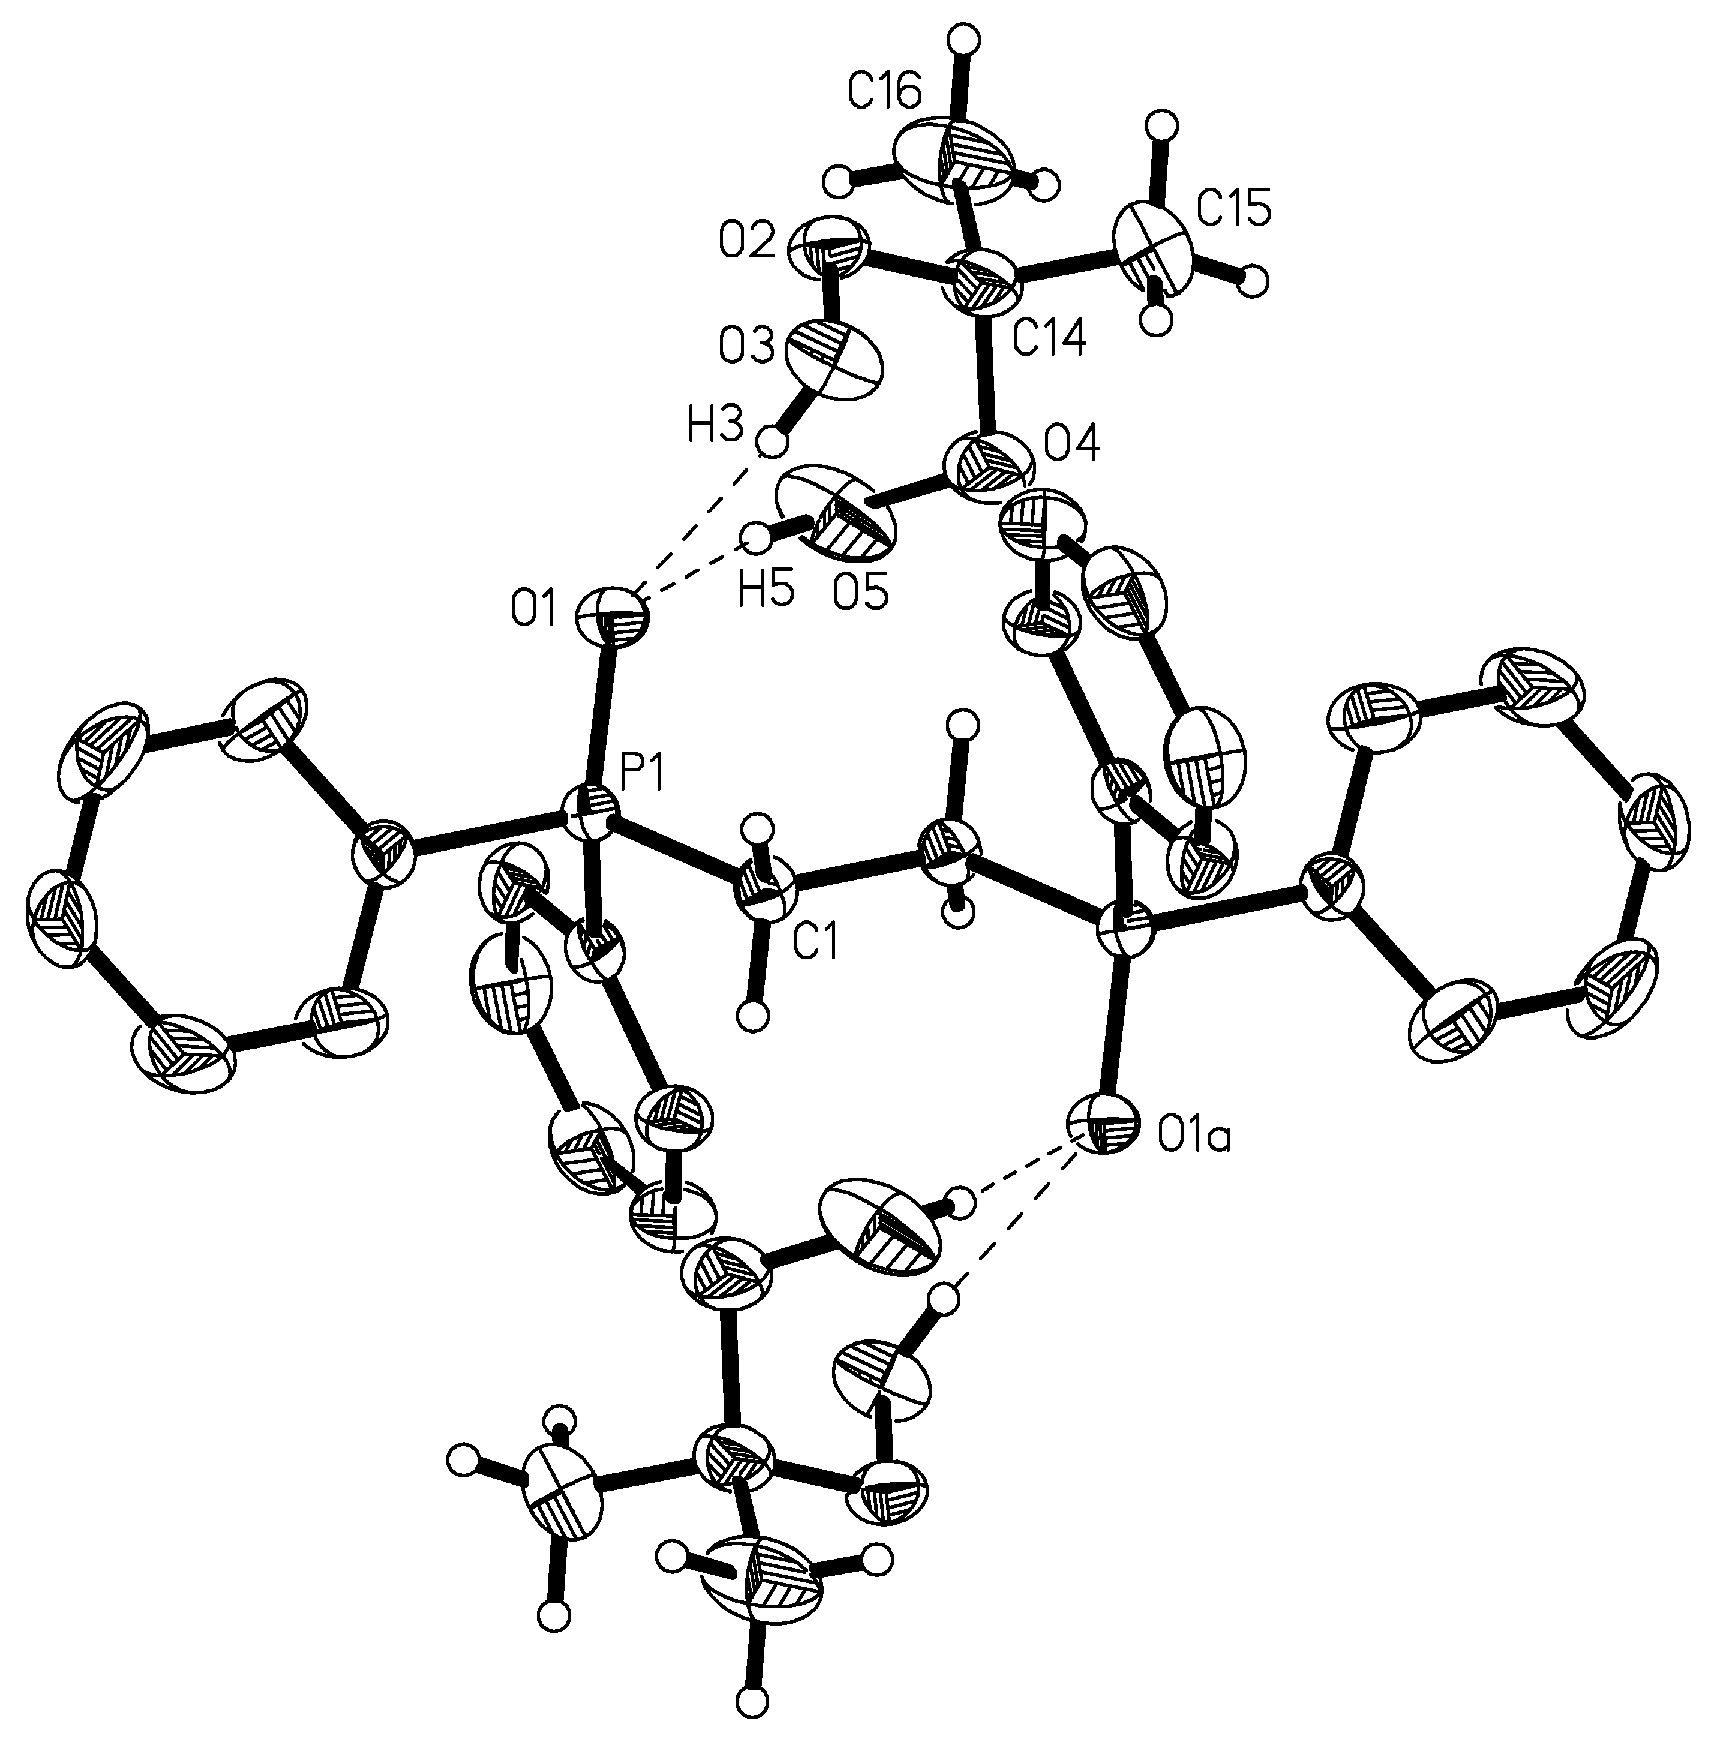
**

**Fig. SI 1** Structure of **3** with labeling scheme. Selected bond distances (Ǻ) and angles (°): P1–N2 1.730(1), P1–N3 1.701(1), P1–C4 1.844(1), N2–C5 1.390(2), N2–C6 1.463(2), N3–C11 1.480(2), N3–C18 1.469(2), C7–C14 1.502(2); N2–P1–N3 92.7(1), N2–P1–C4 101.5(1), N3–P1–C4 98.8(1), P1–N2–C5 124.0(1), P1–N2–C6 113.3(1), C5–N2–C6 121.7(1), P1–N3–C11 108.7(1), P1–N3–C18 118.4(1), C11–N3–C18 107.7(1), P1–C4–C7 119.2(1), P1–C4–C9 121.4(1), N2–C5–C8 121.3(1), N2–C5–C17 121.1(1), N2–C6–C11 106.4(1), C4–C7–C14 122.3(1), N3–C11–C6 107.9(1), N3–C11–C20 104.3(1), N3–C18–C21 106.1(2).

Physical and spectroscopic data for **3**:

Ligand **3** was purified by distillation and was obtained as a white, air and moisture stable solid in 89% yield on cooling; bp 130 °C (10 Pa), mp 138 °C. 1H NMR (200 MHz): δ 1.85–2.12 (m, 4H), 2.62 (s, 3H), 3.08–3.28 (m, 2H), 3.28–3.49 (m, 1H), 3.60–3.68 (m, 1H), 3.88–3.98 (m, 1H), 6.76–6.87 (m, 4H), 7.07–7.38 (m, 5H). 13C NMR (50 MHz): δ 20.3 (d, *J*PC 18.4 Hz), 25.7 (d, *J*PC 6.1 Hz), 30.6 (s), 52.2 (d, *J*PC 27.6 Hz), 53.7 (d, *J*PC 4.5 Hz), 63.9 (d, *J*PC 8.7 Hz), 115.0 (d, 2C, *J*PC 13.1 Hz), 117.4 (s), 125.3 (s), 128.6 (d, *J*PC 5.5 Hz), 128.9–129.4 (m, 5C), 130.7 (d, *J*PC 4.2 Hz), 139.0 (s), 146.7 (s). 31P NMR (40,54 MHz): δ 96.9.

General information for norbornene hydroarylation:

General procedure for the hydroarylation of norbornene [eqn. (3)]: the appropriate catalyst concentration was obtained by successive dilution in DMSO of an initial catalyst solution prepared by mixing 11 x 10–6 mol of Pd(OAc)2 and 23 x 10–6 mol of ligand **3** in 5 mL of DMSO under argon at 60 °C for 10 min (the mixture turned black after complete formation of the catalyst). In a 25 mL two-necked flask the appropriate catalyst solution (5 x 10–7 mol%) in 10 mL of DMSO was introduced under argon. To the stirred solution were added 459 mg of iodobenzene (2.3 x 10–3 mol), 700 mg of norbornene (7.4 x 10–3 mol), 760 mg of NEt3 (7.5 x 10–3) and 280 mg of formic acid (6 x 10–3 mol). The mixture was heated at 120 °C for 16 h. After cooling, 15 mL of water were added and the mixture was extracted with pentane (3 x 30 mL). The organic phases were dried over MgSO4, filtered and the solvents removed under reduced pressure. The product was purified by distillation to afford 387 mg of the expected phenyl norbornane (98% yield) as a viscous oil; bp 124 °C (0.2 mbar). 1H NMR (CDCl3, 200 MHz): δ 1.25–1.92 (m, 8H), 2.44 (s, 2H), 2.83 (q, *J* 8.0 Hz, 1H), 7.20–7.41 (m, 5H). 13C NMR (CDCl3, 50 MHz): δ 29.0 (s), 30.7 (s), 36.1 (s), 36.9 (s), 39.2 (s), 43.0 (s), 47.4 (s), 125.4 (s), 127.1 (s, 2C), 128.3 (s, 2C), 142.7 (s).
